# Supplementary material
Source: PubMed Central journal article supplement (PMC2996712)
Supplement: 1013154107_pnas.201013154SI.pdf [file 1013154107_pnas.201013154SI.pdf]

# Supporting Information

Wright et al. 10.1073/pnas.1013154107

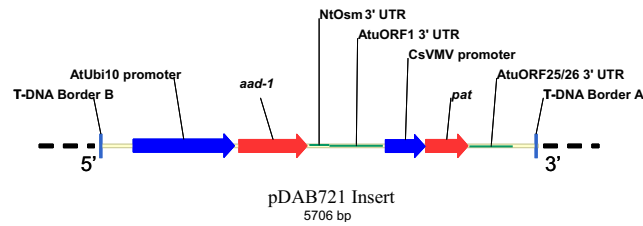

**Fig. S1.** Schematic insert from aryloxyalkanoate dioxygenases (AAD)-1 construct (plasmid pDAB721). Description of construct elements: AtUbi10 promoter, ubiquitin promoter from *Arabidopsis thaliana*; NtOsm3' UTR, 3' UTR from *Nicotiana tabacum* Osmotin; AtuORF1 3' UTR, 3' UTR from *Agrobacterium tumefaciens*; CsVMV promoter, promoter from cassava vein mosaic virus; AtuORF25/26 3' UTR, 3' UTR from *A. tumefaciens*.

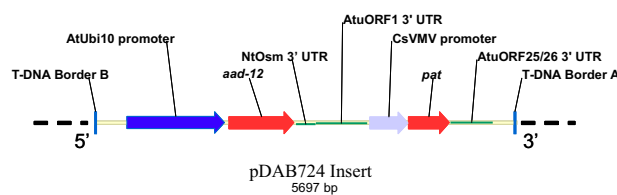

**Fig. S2.** Schematic insert from *aad-12* construct (plasmid pDAB724). Description of construct elements: AtUbi10 promoter, ubiquitin promoter from *A. thaliana*; NtOsm3' UTR, 3' UTR from *N. tabacum* Osmotin; AtuORF1 3' UTR, 3' UTR from *A. tumefaciens*; CsVMV promoter, promoter from cassava vein mosaic virus; AtuORF25/26 3' UTR, 3' UTR from *A. tumefaciens*.

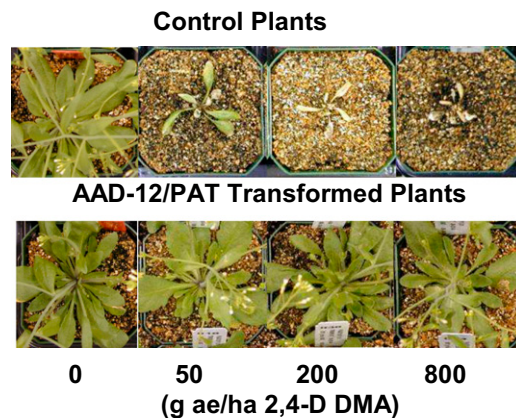

**Fig. S3.** *Aad-12* transformed *Arabidopsis* response to 2,4-D in greenhouse.

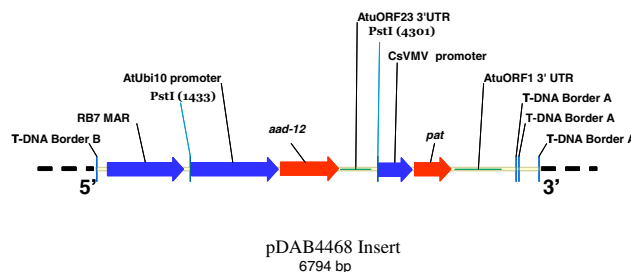

**Fig. S4.** Schematic insert from *aad-12* construct (plasmid pDAB4468). Description of construct elements: AtUbi10 promoter, ubiquitin promoter from *A. thaliana*; NtOsm3' UTR, 3' UTR from *N. tabacum* Osmotin; AtuORF1 3' UTR, 3' UTR from *A. tumefaciens*; CsVMV promoter, promoter from cassava vein mosaic virus; AtuORF25/26 3' UTR, 3' UTR from *A. tumefaciens*.
